# Supplementary material
Source: publisher site journal article supplement (https://www.dovepress.com/article/360222)
Supplement: Supplementary file 1 [file get_supplementary_file.php]

Table S1. Multiple logistic regression analysis for identification of all pathogens and viruses according to individual comorbidity

|  | All pathogens | | Viruses | |
| --- | --- | --- | --- | --- |
|  | Odds ratio (95% CI) | P-value | Odds ratio (95% CI) | P-value |
| Age | 1.008 (0.995-1.021) | 0.234 | 1.004 (0.990-1.018) | 0.552 |
| Male sex | 0.663 (0.486-0.905) | 0.010 | 0.821 (0.593-1.137) | 0.235 |
| Use of ICS | 1.234 (0.980-1.554) | 0.074 | 0.930 (0.728-1.189) | 0.563 |
| Pulmonary comorbidities |  |  |  |  |
| Previous pulmonary tuberculosis | 1.125 (0.873-1.451) | 0.362 | 0.902 (0.690-1.179) | 0.449 |
| Bronchiectasis | 1.173 (0.824-1.669) | 0.376 | 1.035 (0.718-1.492) | 0.854 |
| Interstitial lung disease | 0.929 (0.427-2.022) | 0.854 | 0.698 (0.290-1.681) | 0.423 |
| Extrapulmonary comorbidities |  |  |  |  |
| Diabetes mellitus | 1.282 (0.986-1.666) | 0.064 | 0.991 (0.747-1.314) | 0.949 |
| Hypertension | 1.129 (0.886-1.439) | 0.328 | 1.061 (0.822-1.369) | 0.649 |
| Liver cirrhosis | 0.823 (0.356-1.906) | 0.650 | 0.448 (0.150-1.338) | 0.150 |
| Congestive heart failure | 1.003 (0.711-1.415) | 0.985 | 0.974 (0.680-1.395) | 0.886 |
| Chronic kidney disease | 0.830 (0.511-1.347) | 0.450 | 1.009 (0.607-1.679) | 0.971 |
| Cerebrovascular disease | 1.209 (0.734-1.992) | 0.455 | 1.334 (0.807-2.205) | 0.261 |
| Advanced cancer | 1.235 (0.857-1.781) | 0.258 | 0.799 (0.538-1.187) | 0.266 |

CI, Confidence interval; ICS, inhaled corticosteroid. Hosmer-Lemeshow test, p = 0.998 (all pathogens) and p = 0.541 (viruses), respectively.

Table S2. Microbiologic analysis in AECOPD patients with hypertension, liver cirrhosis, cerebrovascular disease, and advanced cancer

|  | Hypertension | | | Liver cirrhosis | | | Cerebrovascular disease | | | Advanced cancer | | |
| --- | --- | --- | --- | --- | --- | --- | --- | --- | --- | --- | --- | --- |
|  | (+)  (n=584) | (-)  (n=602) | p-value | (+)  (n=23) | (-)  (n=1163) | p-value | (+)  (n=70) | (-)  (n=1116) | p-value | (+)  (n=138) | (-)  (n=1048) | p-value |
| Bacteria |  |  |  |  |  |  |  |  |  |  |  |  |
| *M. pneumoniae* | 43 (9.7) | 30 (6.7) | 0.099 | 2 (10.5) | 71 (8.1) | 0.664 | 5 (8.9) | 68 (8.1) | 0.800 | 15 (15.0) | 58 (7.3) | 0.008 |
| *C. pneumoniae* | 8 (2.0) | 10 (2.5) | 0.653 | 0 (0.0) | 18 (2.3) | >0.999 | 1 (2.0) | 17 (2.3) | >0.999 | 3 (3.3) | 15 (2.1) | 0.452 |
| *L. pneumophila* | 1 (0.3) | 4 (1.4) | 0.208 | 0 (0.0) | 5 (0.9) | >0.999 | 0 (0.0) | 5 (0.9) | >0.999 | 1 (1.2) | 4 (0.8) | 0.531 |
| *H. Influenzae* | 10 (1.7) | 12 (2.0) | 0.730 | 1 (4.3) | 21 (1.8) | 0.357 | 1 (1.4) | 21 (1.9) | >0.999 | 2 (1.5) | 20 (1.9) | >0.999 |
| *S. pneumoniae* | 35 (6.1) | 24 (4.0) | 0.107 | 0 (0.0) | 59 (5.1) | 0.625 | 5 (7.1) | 54 (4.9) | 0.393 | 5 (3.6) | 54 (5.2) | 0.426 |
| *M. catarrhalis* | 6 (1.0) | 4 (0.7) | 0.540 | 0 (0.0) | 10 (0.9) | >0.999 | 2 (2.9) | 8 (0.7) | 0.117 | 2 (1.5) | 8 (0.8) | 0.331 |
| *P. aeruginosa* | 57 (9.9) | 59 (9.9) | 0.993 | 2 (8.7) | 114 (9.9) | >0.999 | 3 (4.3) | 113 (10.3) | 0.104 | 7 (5.1) | 109 (10.6) | 0.045 |
| *K. pneumoniae* | 26 (4.5) | 25 (4.2) | 0.784 | 3 (13.0) | 48 (4.2) | 0.075 | 2 (2.9) | 49 (4.5) | 0.764 | 10 (7.3) | 41 (4.0) | 0.073 |
| *E. coli* | 17 (3.0) | 11 (1.8) | 0.213 | 1 (4.3) | 27 (2.4) | 0.430 | 0 (0.0) | 28 (2.5) | 0.406 | 6 (4.4) | 22 (2.1) | 0.128 |
| S. aureus |  |  |  |  |  |  |  |  |  |  |  |  |
| MSSA | 3 (0.5) | 2 (0.3) | 0.682 | 0 (0.0) | 5 (0.4) | >0.999 | 1 (1.4) | 4 (0.4) | 0.266 | 1 (0.7) | 4 (0.4) | 0.464 |
| MRSA | 17 (3.0) | 10 (1.7) | 0.145 | 0 (0.0) | 27 (2.4) | >0.999 | 1 (1.4) | 26 (2.4) | >0.999 | 3 (2.2) | 24 (2.3) | >0.999 |
| *S. maltophilia* | 4 (0.7) | 0 (0.0) | 0.058 | 0 (0.0) | 4 (0.3) | >0.999 | 1 (1.4) | 3 (0.3) | 0.219 | 1 (0.7) | 3 (0.3) | 0.393 |
| Virus |  |  |  |  |  |  |  |  |  |  |  |  |
| Rhinovirus | 55 (11.2) | 48 (9.6) | 0.421 | 0 (0.0) | 103 (10.6) | 0.254 | 7 (10.4) | 96 (10.4) | 0.988 | 10 (8.9) | 93 (10.6) | 0.590 |
| Adenovirus | 8 (1.6) | 5 (1.0) | 0.388 | 0 (0.0) | 13 (1.3) | >0.999 | 0 (0.0) | 13 (1.4) | >0.999 | 2 (1.8) | 11 (1.3) | 0.650 |
| Influenza A | 62 (11.0) | 62 (10.7) | 0.901 | 2 (8.7) | 122 (10.9) | >0.999 | 5 (7.1) | 119 (11.1) | 0.302 | 14 (10.6) | 110 (10.9) | 0.921 |
| Influenza B | 19 (3.4) | 20 (3.5) | 0.923 | 0 (0.0) | 39 (3.5) | >0.999 | 3 (4.3) | 36 (3.4) | 0.728 | 0 (0.0) | 39 (3.9) | 0.018 |
| RSV | 21 (4.3) | 21 (4.2) | 0.952 | 1 (5.0) | 41 (4.2) | 0.585 | 5 (7.5) | 37 (4.0) | 0.198 | 5 (4.5) | 37 (4.2) | 0.806 |
| Parainfluenza | 21 (4.3) | 17 (3.4) | 0.484 | 0 (0.0) | 38 (3.9) | >0.999 | 2 (3.0) | 36 (3.9) | >0.999 | 3 (2.7) | 35 (4.0) | 0.792 |
| Coronavirus | 23 (4.7) | 15 (3.0) | 0.173 | 0 (0.0) | 38 (3.9) | >0.999 | 2 (3.0) | 36 (3.9) | >0.999 | 2 (1.8) | 36 (4.1) | 0.302 |
| Metapneumovirus | 18 (3.7) | 18 (3.6) | 0.965 | 1 (5.0) | 35 (3.6) | 0.527 | 6 (9.0) | 30 (3.3) | 0.030 | 5 (4.5) | 31 (3.5) | 0.591 |

Data are presented as n (%).
